# Supplementary material for: Fine mapping of stable QTLs related to eating quality in rice (Oryza sativa L.) by CSSLs harboring small target chromosomal segments
Source: PubMed Central journal article supplement — Breed Sci. 2011 Dec 15;61(4):338–46. doi: 10.1270/jsbbs.61.338 (PMC3406775; doi:10.1270/jsbbs.61.338), 2011-12-15
Supplement: 61-4-338supplFig.pdf [file 61-4-338supplFig.pdf]

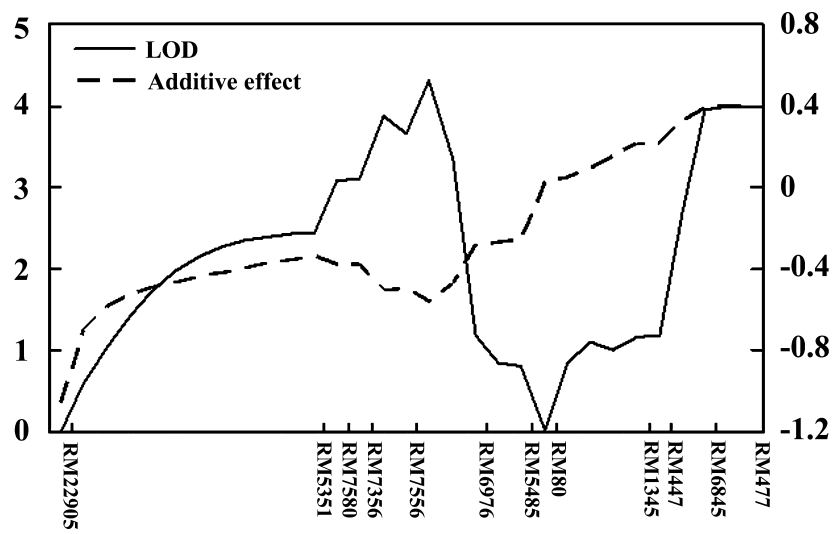

**Supplemental Fig. 1.** The LOD values and the additive effects of QTLs for AC detected by IciMapping v 3.0 in BC<sub>4</sub>F<sub>2</sub> population in the summer of 2008.
