# Supplementary material for: Fine mapping of stable QTLs related to eating quality in rice (Oryza sativa L.) by CSSLs harboring small target chromosomal segments
Source: PubMed Central journal article supplement — Breed Sci. 2011 Dec 15;61(4):338–46. doi: 10.1270/jsbbs.61.338 (PMC3406775; doi:10.1270/jsbbs.61.338), 2011-12-15
Supplement: 61-4-338supplTable.pdf [file 61-4-338supplTable.pdf]

Supplemental Table 1. Measurements of various traits for sub-CSSLs located in the interval RM5351 – RM5485 in 2009

| Lines and cultivars | Agronomic characters <sup>a</sup> |           |            |                 |            |
|---------------------|-----------------------------------|-----------|------------|-----------------|------------|
|                     | GL (mm)                           | GW (mm)   | LWR        | Plant high (cm) | DTH (days) |
| Line 1              | 7.42±0.21                         | 3.42±0.01 | 2.17±0.034 | 115.4±1.14      | 86.1±1.16  |
| Line 2              | 7.45±0.32                         | 3.45±0.05 | 2.16±0.047 | 116.2±1.21      | 85.4±1.32  |
| Line 3              | 7.42±0.15                         | 3.43±0.04 | 2.16±0.052 | 115.7±1.44      | 85.5±1.16  |
| Line 4              | 7.44±0.20                         | 3.43±0.10 | 2.16±0.040 | 116.6±1.11      | 86.4±1.02  |
| Line 5              | 7.42±0.19                         | 3.43±0.03 | 2.16±0.018 | 116.0±1.13      | 86.3±1.26  |
| Line 6              | 7.41±0.22                         | 3.41±0.03 | 2.17±0.027 | 115.4±1.01      | 85.4±1.12  |
| Line 7              | 7.39±0.13                         | 3.40±0.07 | 2.17±0.023 | 116.2±1.13      | 85.6±1.23  |
| Line 8              | 7.41±0.17                         | 3.40±0.02 | 2.18±0.017 | 116.2±1.01      | 85.2±1.12  |
| Line 9              | 7.42±0.11                         | 3.44±0.04 | 2.15±0.024 | 115.6±1.27      | 85.1±1.31  |
| Line 10             | 7.38±0.17                         | 3.42±0.05 | 2.16±0.028 | 116.4±1.19      | 86.3±1.06  |
| Line 11             | 7.41±0.29                         | 3.39±0.05 | 2.18±0.022 | 115.2±1.11      | 85.3±1.32  |
| Line 12             | 7.39±0.23                         | 3.43±0.04 | 2.15±0.033 | 115.6±1.34      | 85.7±1.13  |
| Line 13             | 7.41±0.19                         | 3.40±0.05 | 2.17±0.017 | 116.2±1.01      | 86.2±1.12  |
| Line 14             | 7.42±0.10                         | 3.44±0.07 | 2.16±0.024 | 115.7±1.04      | 85.6±1.26  |
| Asominori           | 7.42±0.17                         | 3.44±0.05 | 2.16±0.038 | 114.2±1.04      | 85.4±1.26  |

<sup>a</sup>GL, Grain length; GW, Grain width; LWR, Length/width ratio; DTH, Days-to-heading.

Average of two locations in 2009. Data are presented as means ± SD from three replicates.
